# Supplementary material
Source: MDPI journal article supplement (https://www.mdpi.com/2673-9992/3/1/5)
Supplement: s1 [file s1]

# The pluripotency transcription factor Oct4 contributes to head and neck squamous cell carcinoma radioresistance via regulation of DNA repair and the stem cell phenotype

Jacqueline Nathansen<sup>1,2</sup>, Vasyl Lukiyanchuk<sup>1,2</sup>, Linda Hein<sup>1</sup>, Maya-Isabell Stolte<sup>3</sup>, Kerstin Borgmann<sup>3</sup>, Steffen Löck<sup>1,4,5</sup>, Ina Kurth<sup>1,6</sup>, Mechthild Krause<sup>1,2,4,5,7</sup>, Michael Baumann<sup>6</sup>, Annett Linge<sup>1,4,5,7</sup>, Anna Dubrovskaja<sup>1,2,4,7</sup>

<sup>1</sup>OncoRay – National Center for Radiation Research in Oncology, Faculty of Medicine and University Hospital Carl Gustav Carus, Technische Universität Dresden, Germany; <sup>2</sup>Helmholtz-Zentrum Dresden-Rossendorf, Institute of Radiooncology-OncoRay, Dresden, Germany; <sup>3</sup>Laboratory of Radiobiology and Experimental Radiooncology, Center of Oncology, University Medical Center Hamburg-Eppendorf, Hamburg, Germany; <sup>4</sup>German Cancer Consortium (DKTK), partner site Dresden and German Cancer Research Center (DKFZ), Heidelberg; <sup>5</sup>Department of Radiotherapy and Radiation Oncology, Faculty of Medicine and University Hospital Carl Gustav Carus, Technische Universität Dresden, Dresden, Germany; <sup>6</sup>German Cancer Research Center (DKFZ), Heidelberg, Germany; <sup>7</sup>National Center for Tumor Diseases (NCT), partner site Dresden, German Cancer Research Center (DKFZ), Heidelberg; Faculty of Medicine and University Hospital Carl Gustav Carus, Technische Universität Dresden, and Helmholtz-Zentrum Dresden-Rossendorf (HZDR), Dresden, Germany.

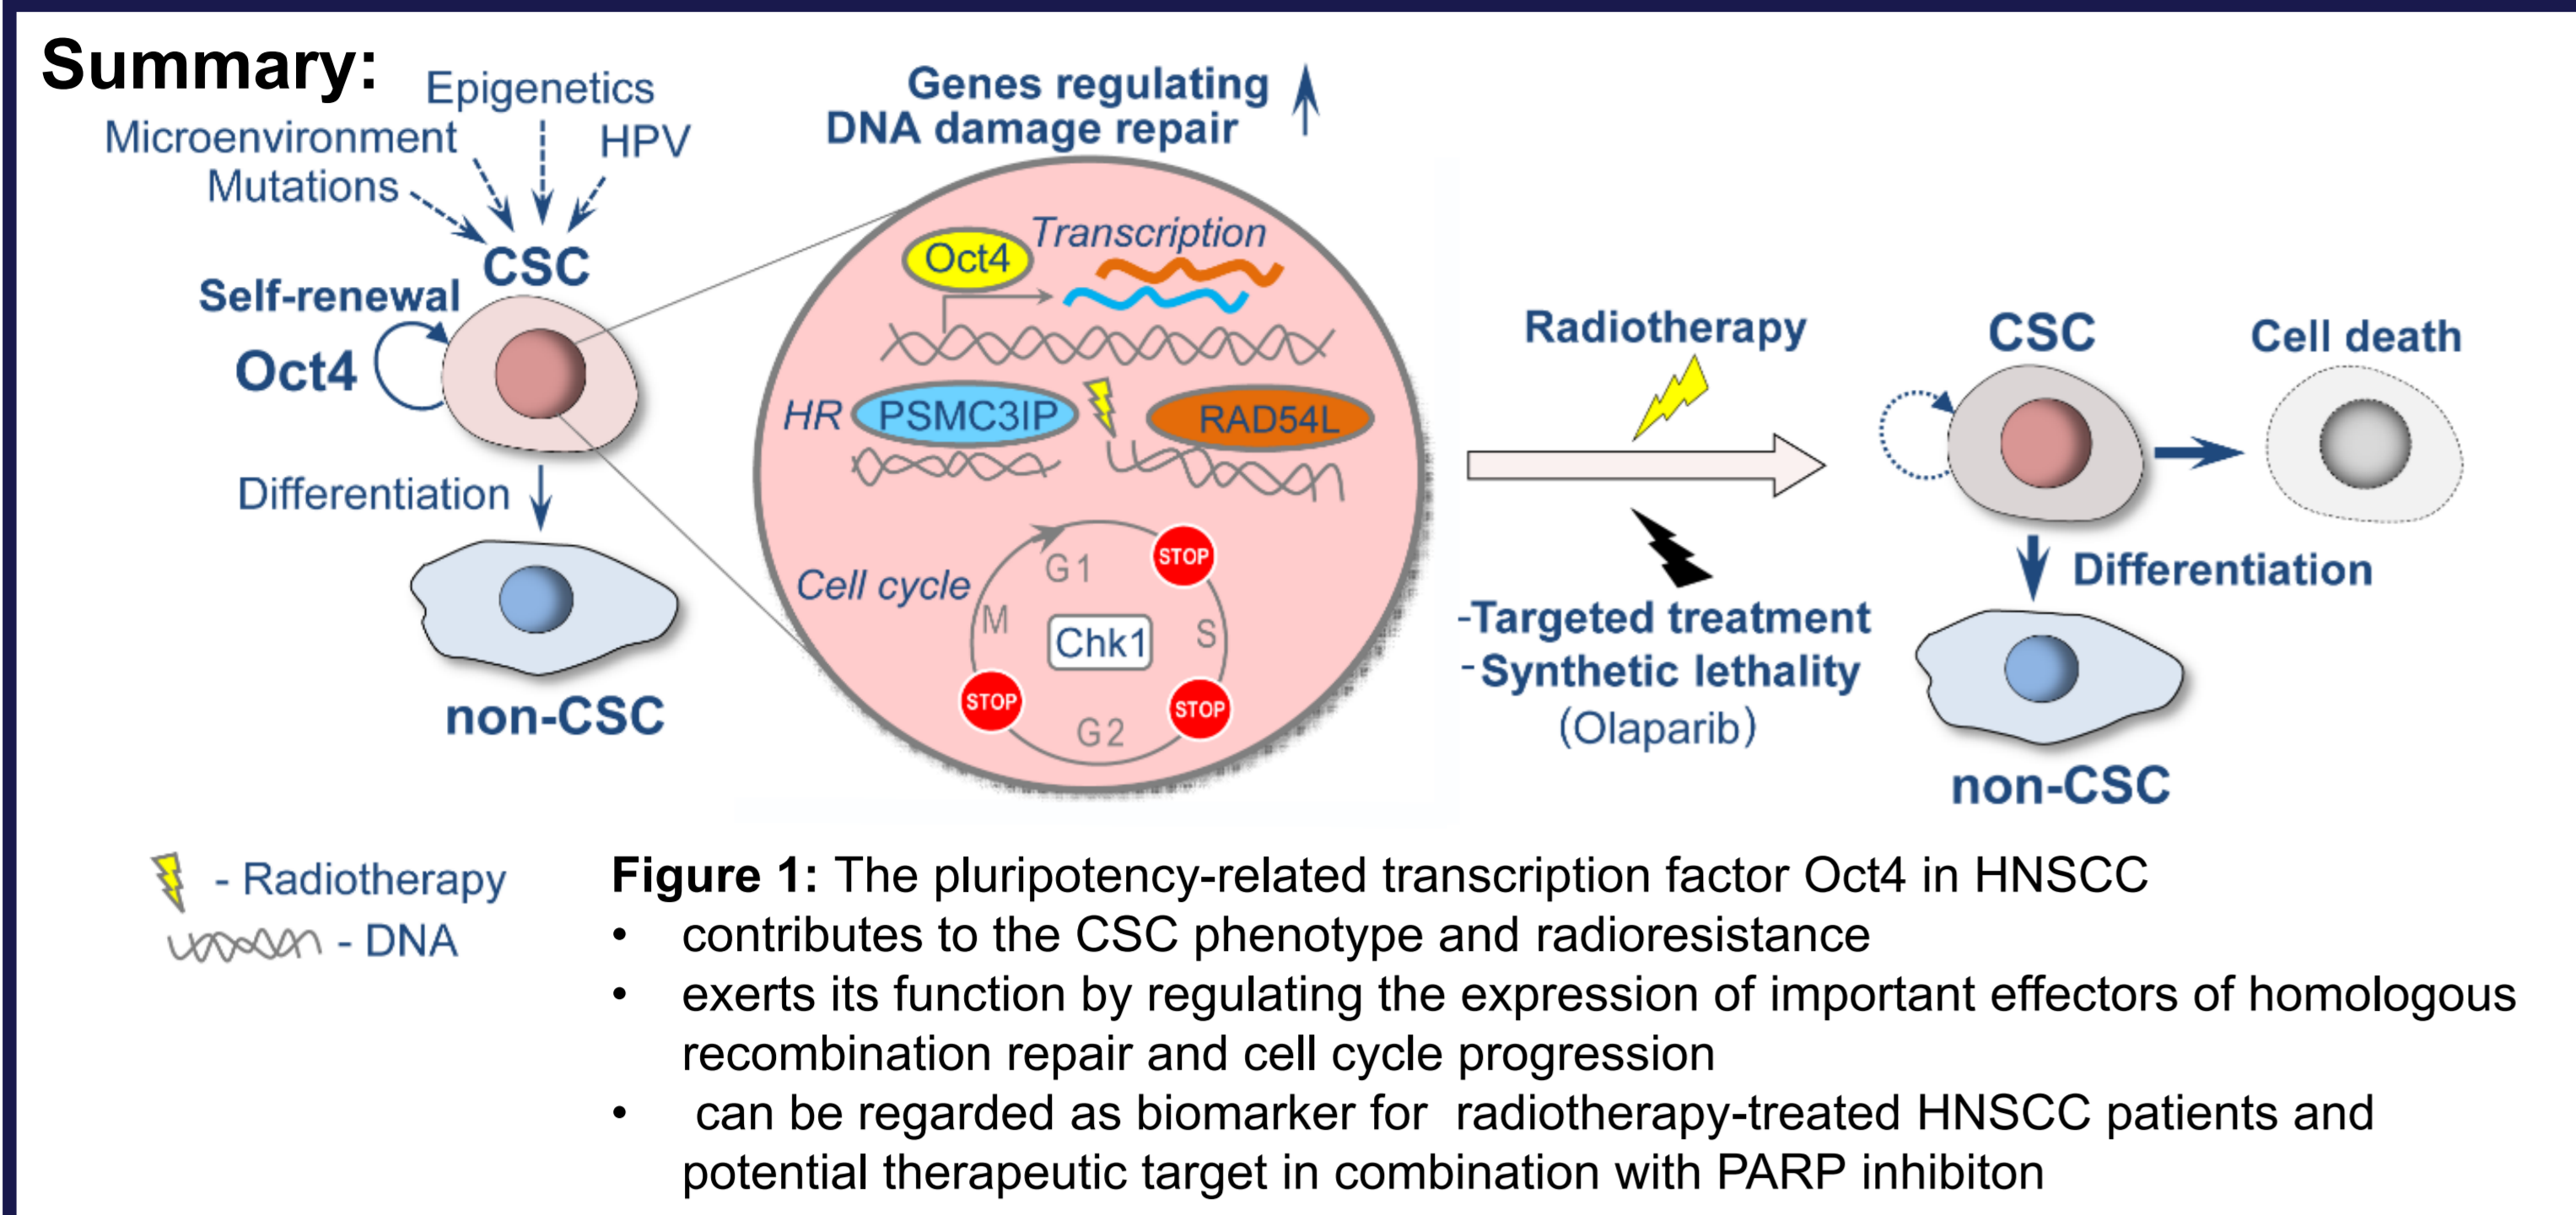

**Background:** Despite being the sixth most common cancer type worldwide, head and neck squamous cell carcinoma (HNSCC) exhibits low five-year survival rates for advanced-stage patients.<sup>1,2</sup>

In contrast to HNSCC caused by human papillomavirus (HPV) infections, HPV-negative HNSCC cases often exhibit considerable resistance to radiotherapy.<sup>3</sup> Yet knowledge about radioresistance factors and potential therapeutic targets in HPV-negative HNSCC is limited. The local control probability after radiotherapy crucially depends on the eradication of cancer stem cells (CSCs), a sub-population of tumor cells characterized by pluripotency and an active DNA repair.<sup>3,4</sup>

This study provides evidence that the cancer stem cell (CSC)-related transcription factor Oct4 contributes to HNSCC radioresistance by regulating the DNA damage response and stem cell phenotype.

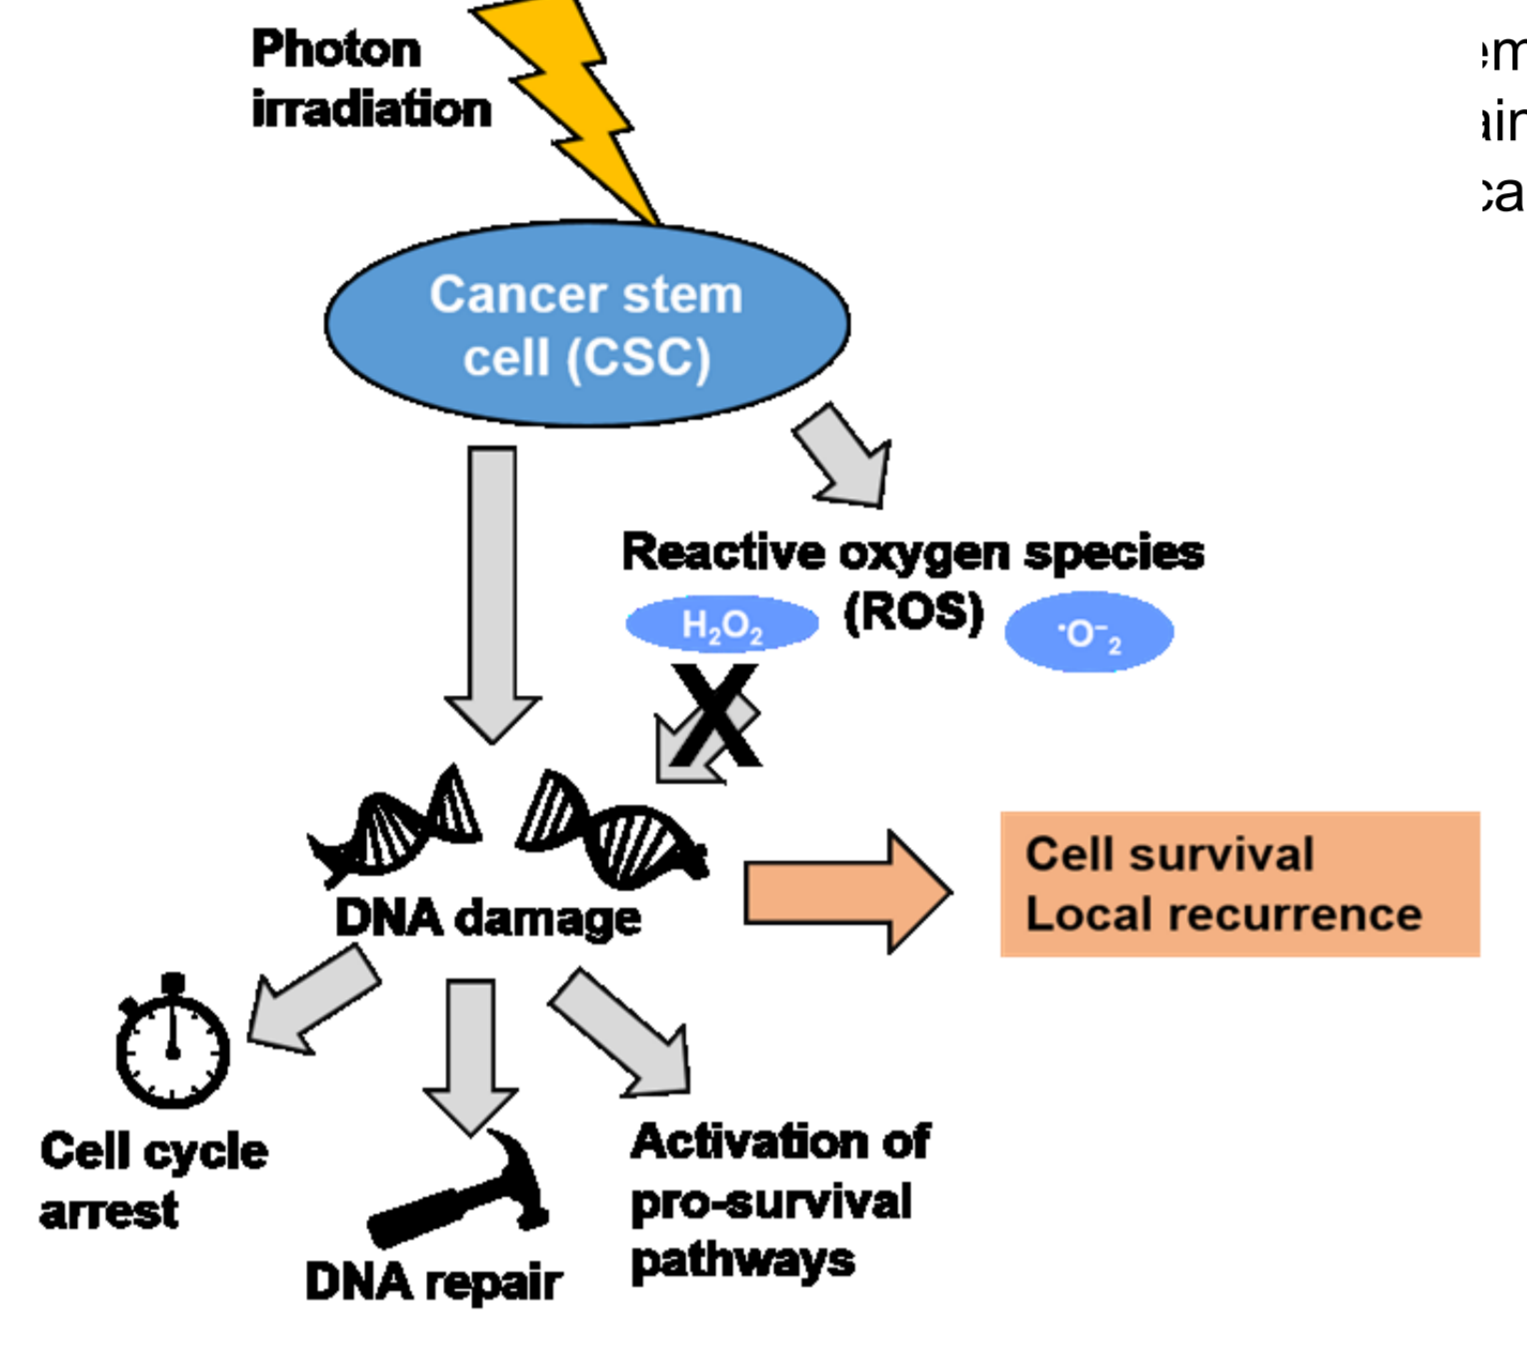

Understanding the role of Oct4 in HPV-negative HNSCC radioresistance is challenged by the existence of different Oct4 transcript variants and protein isoforms with presumably different functions.<sup>6,7</sup>

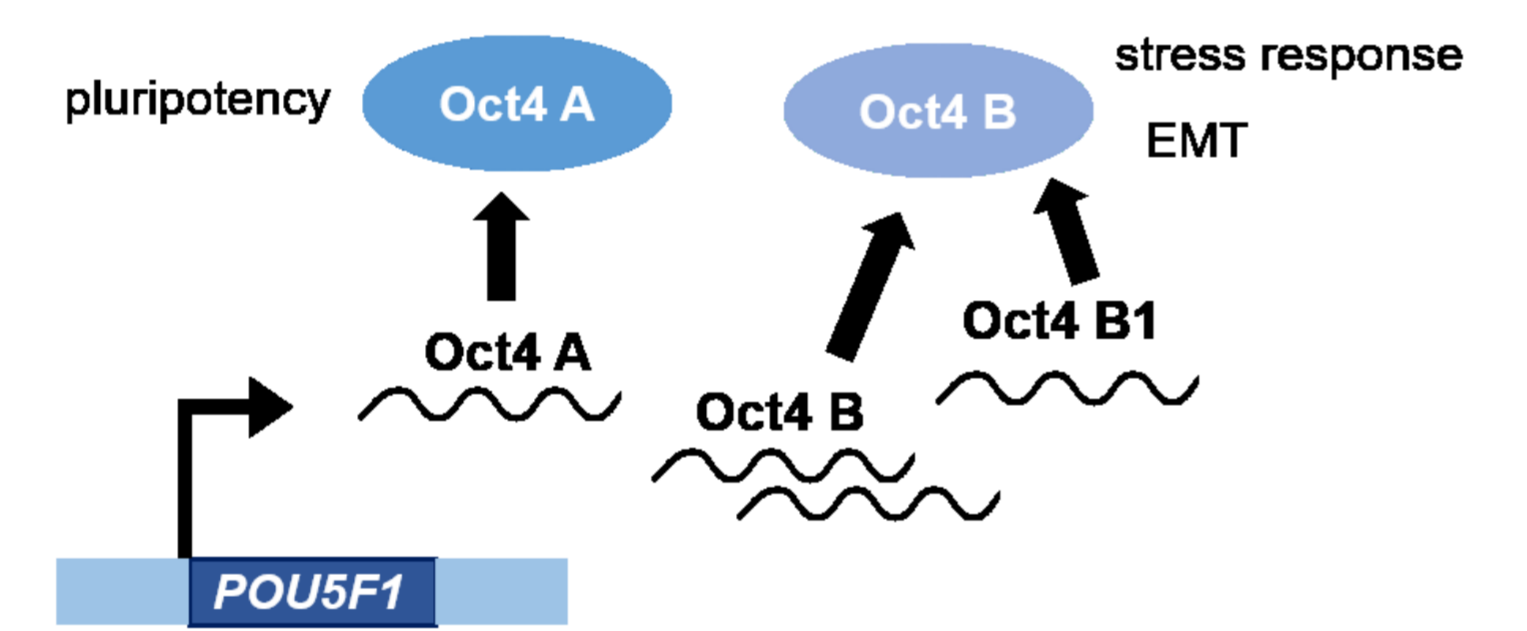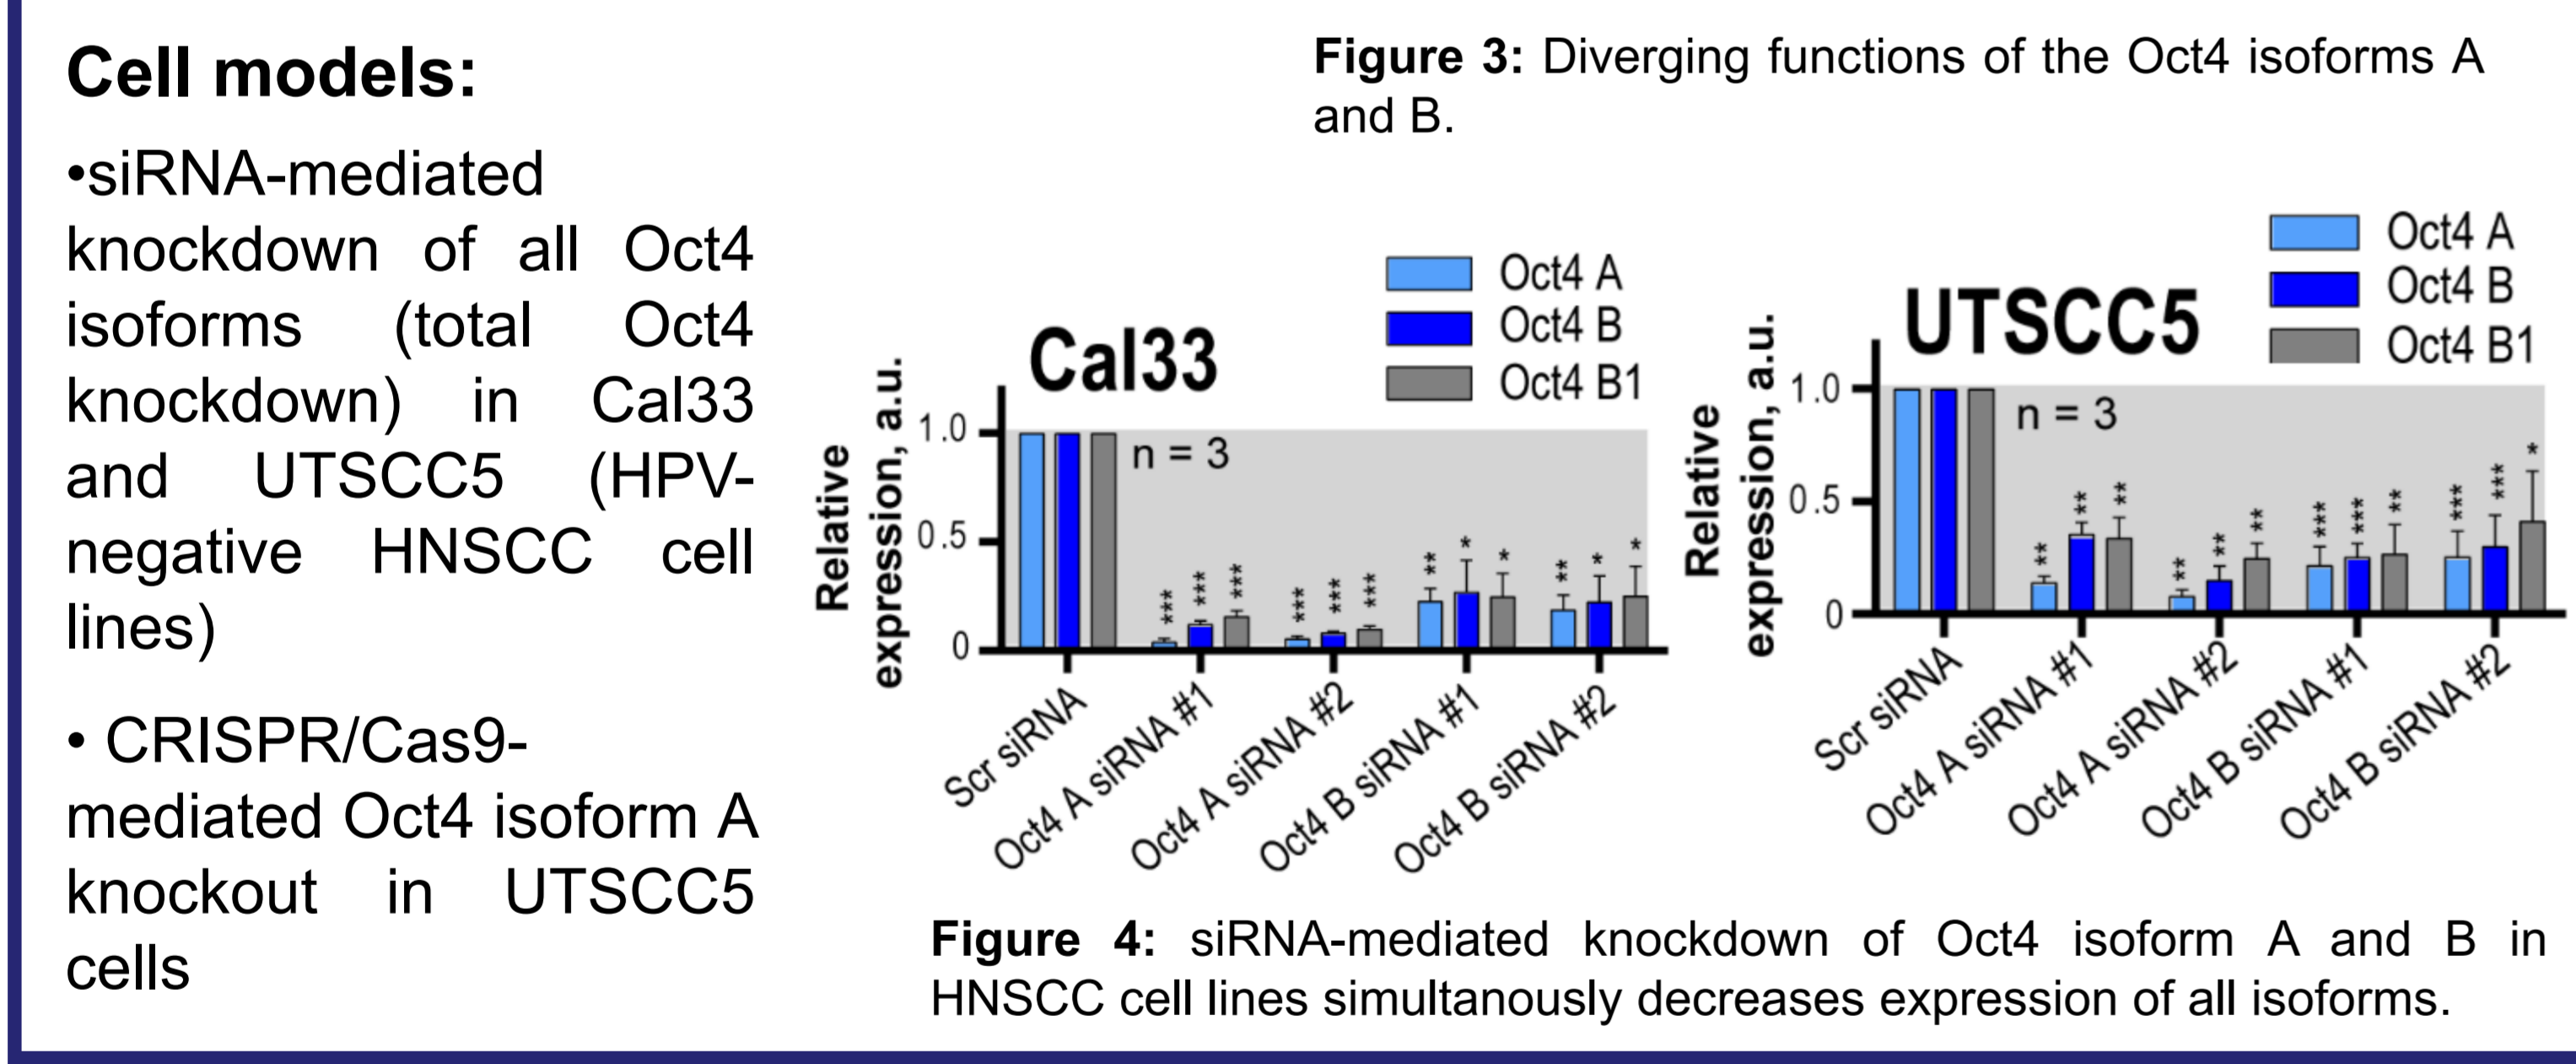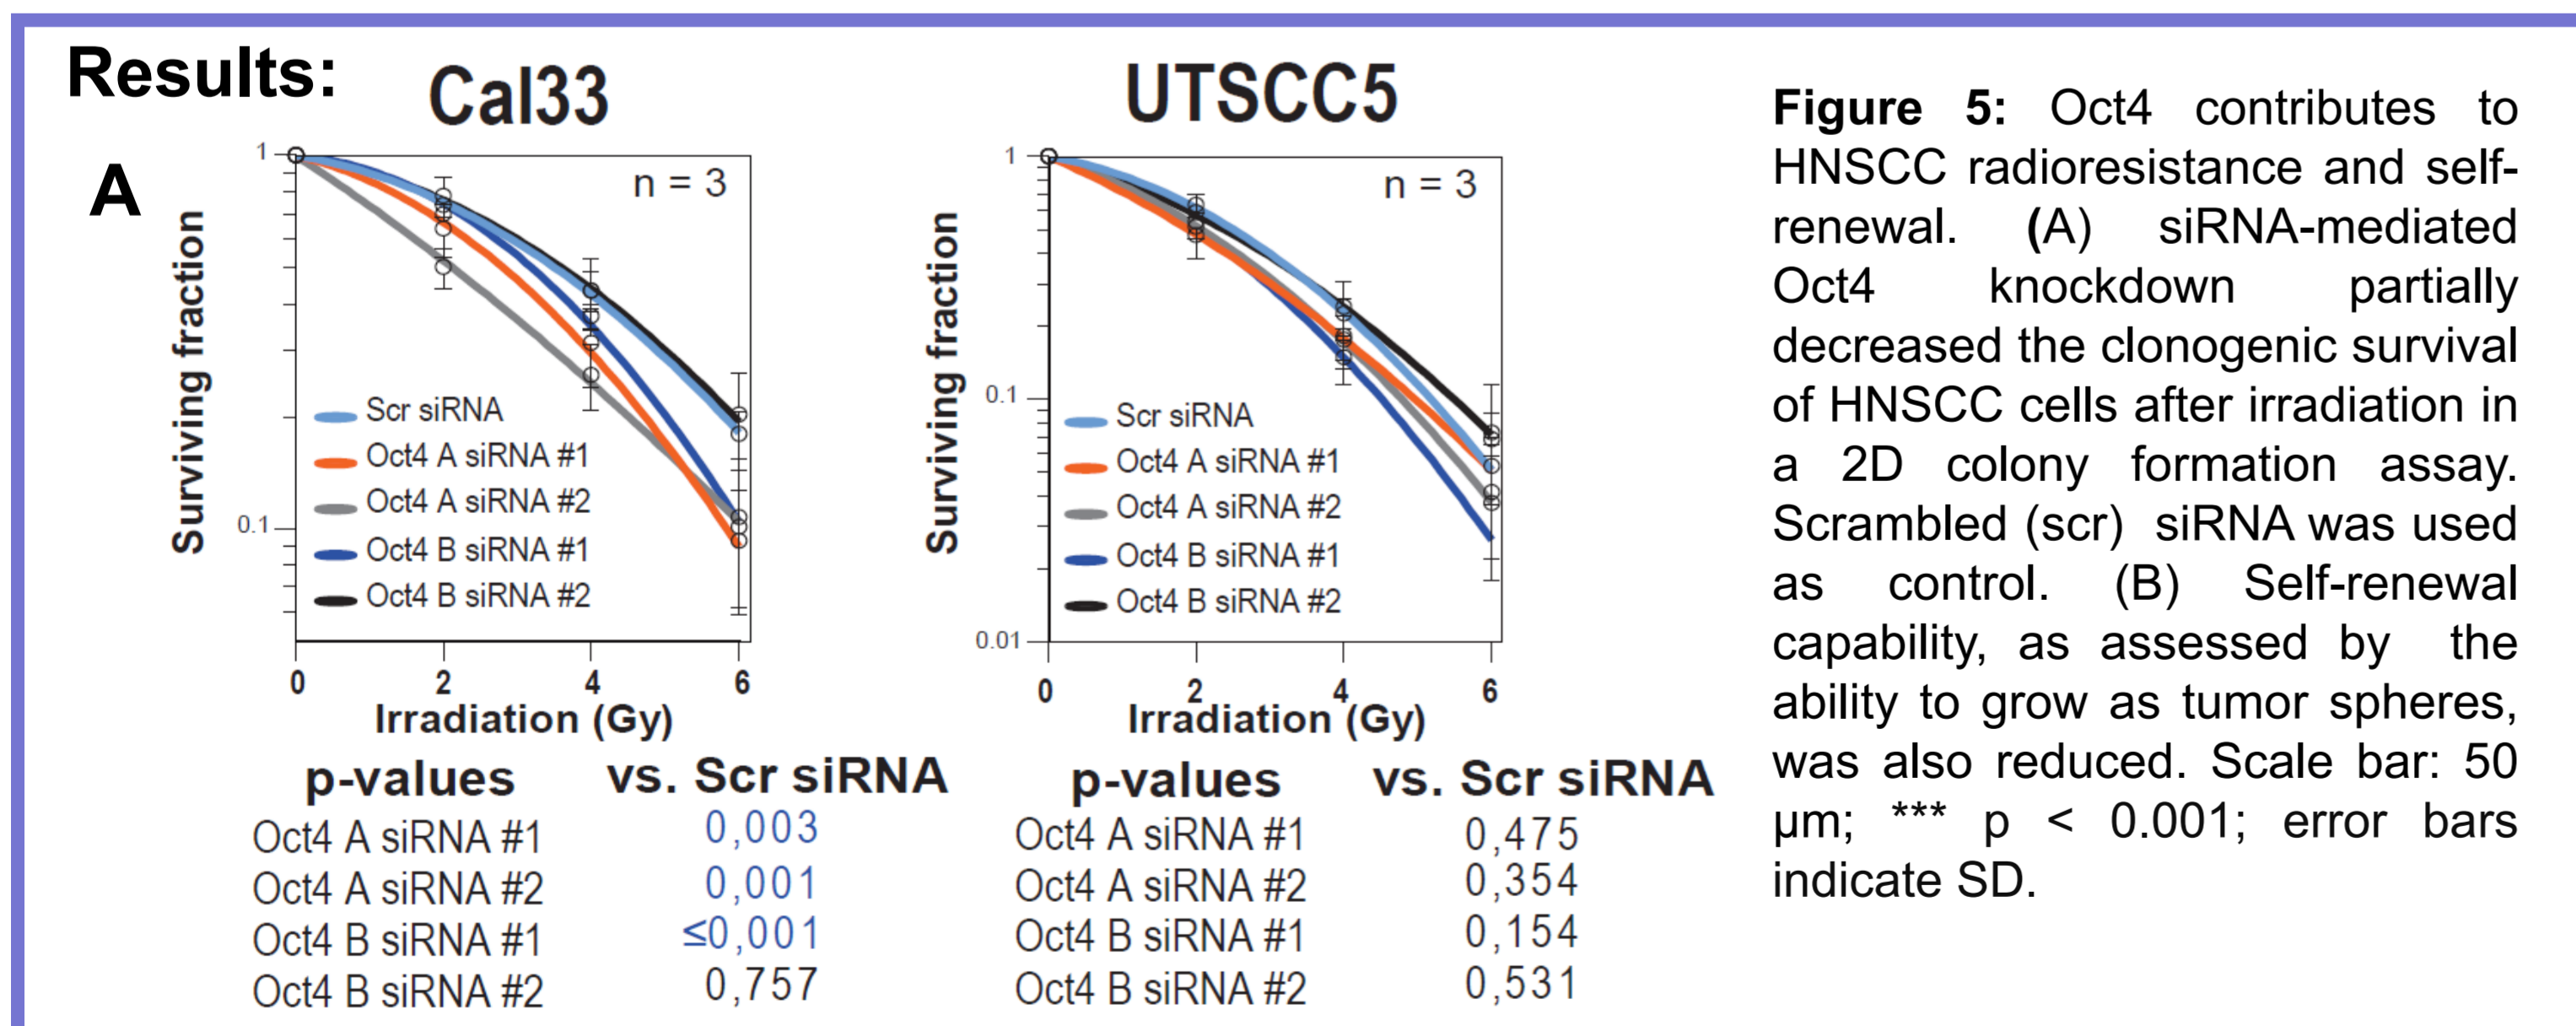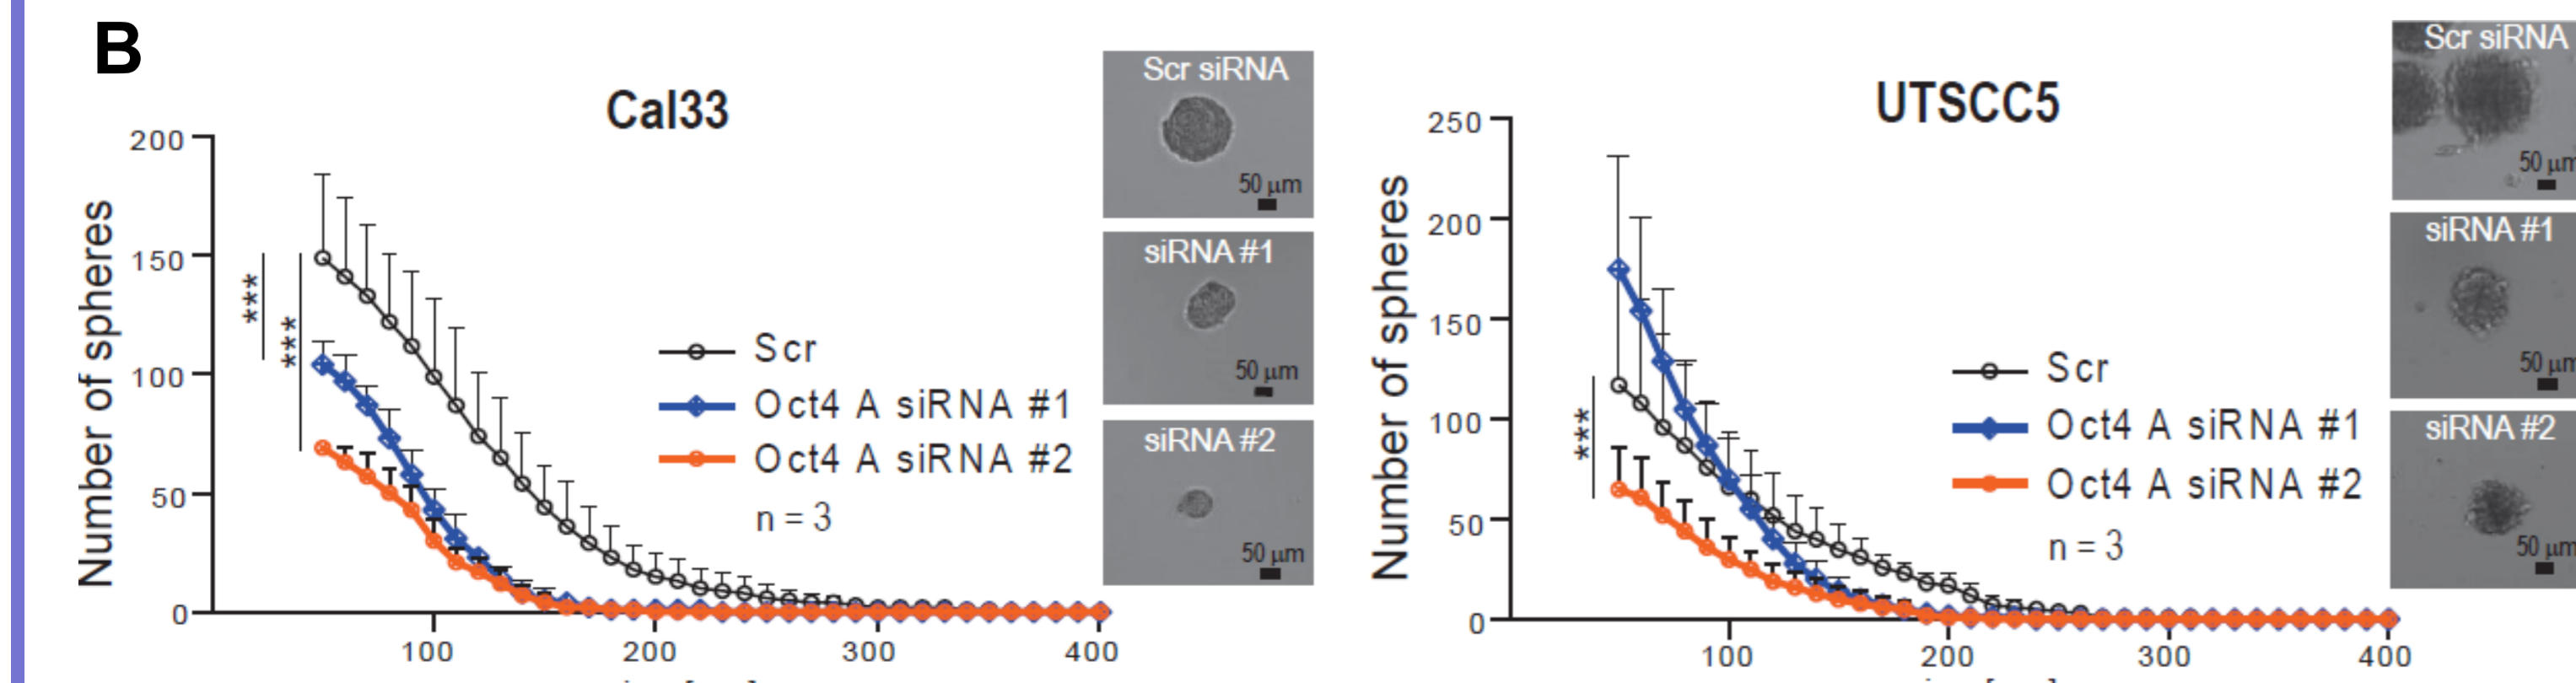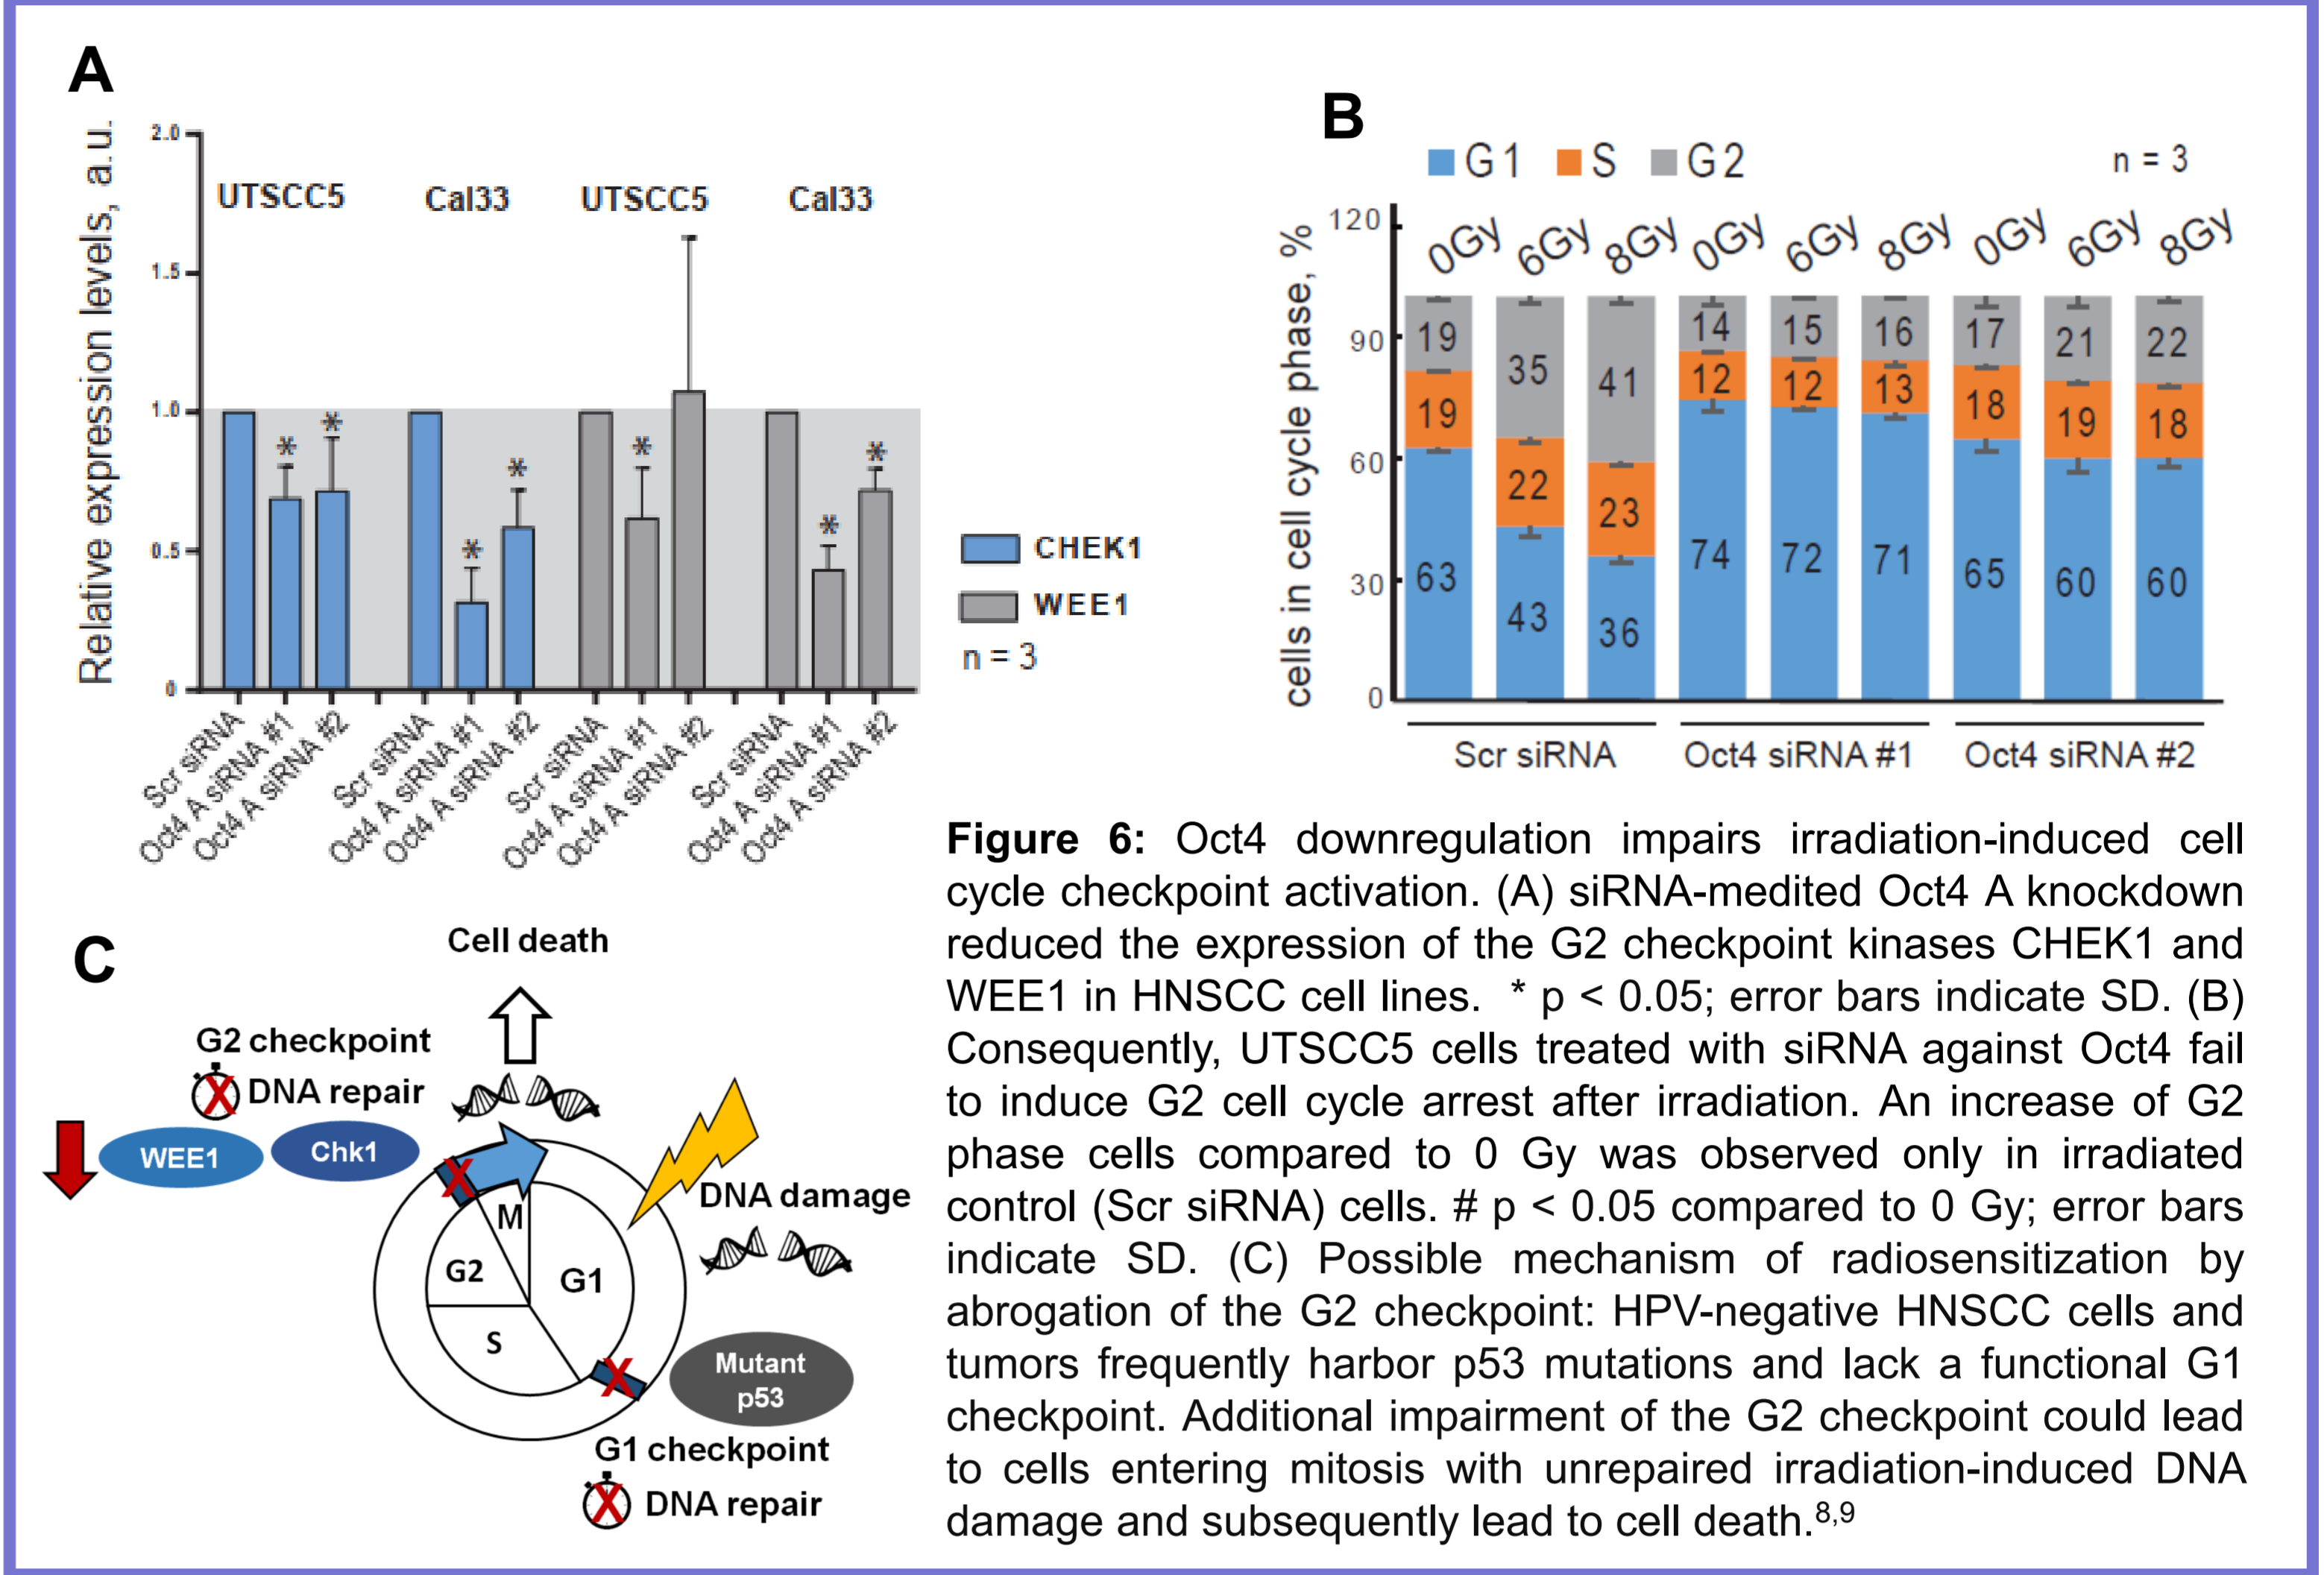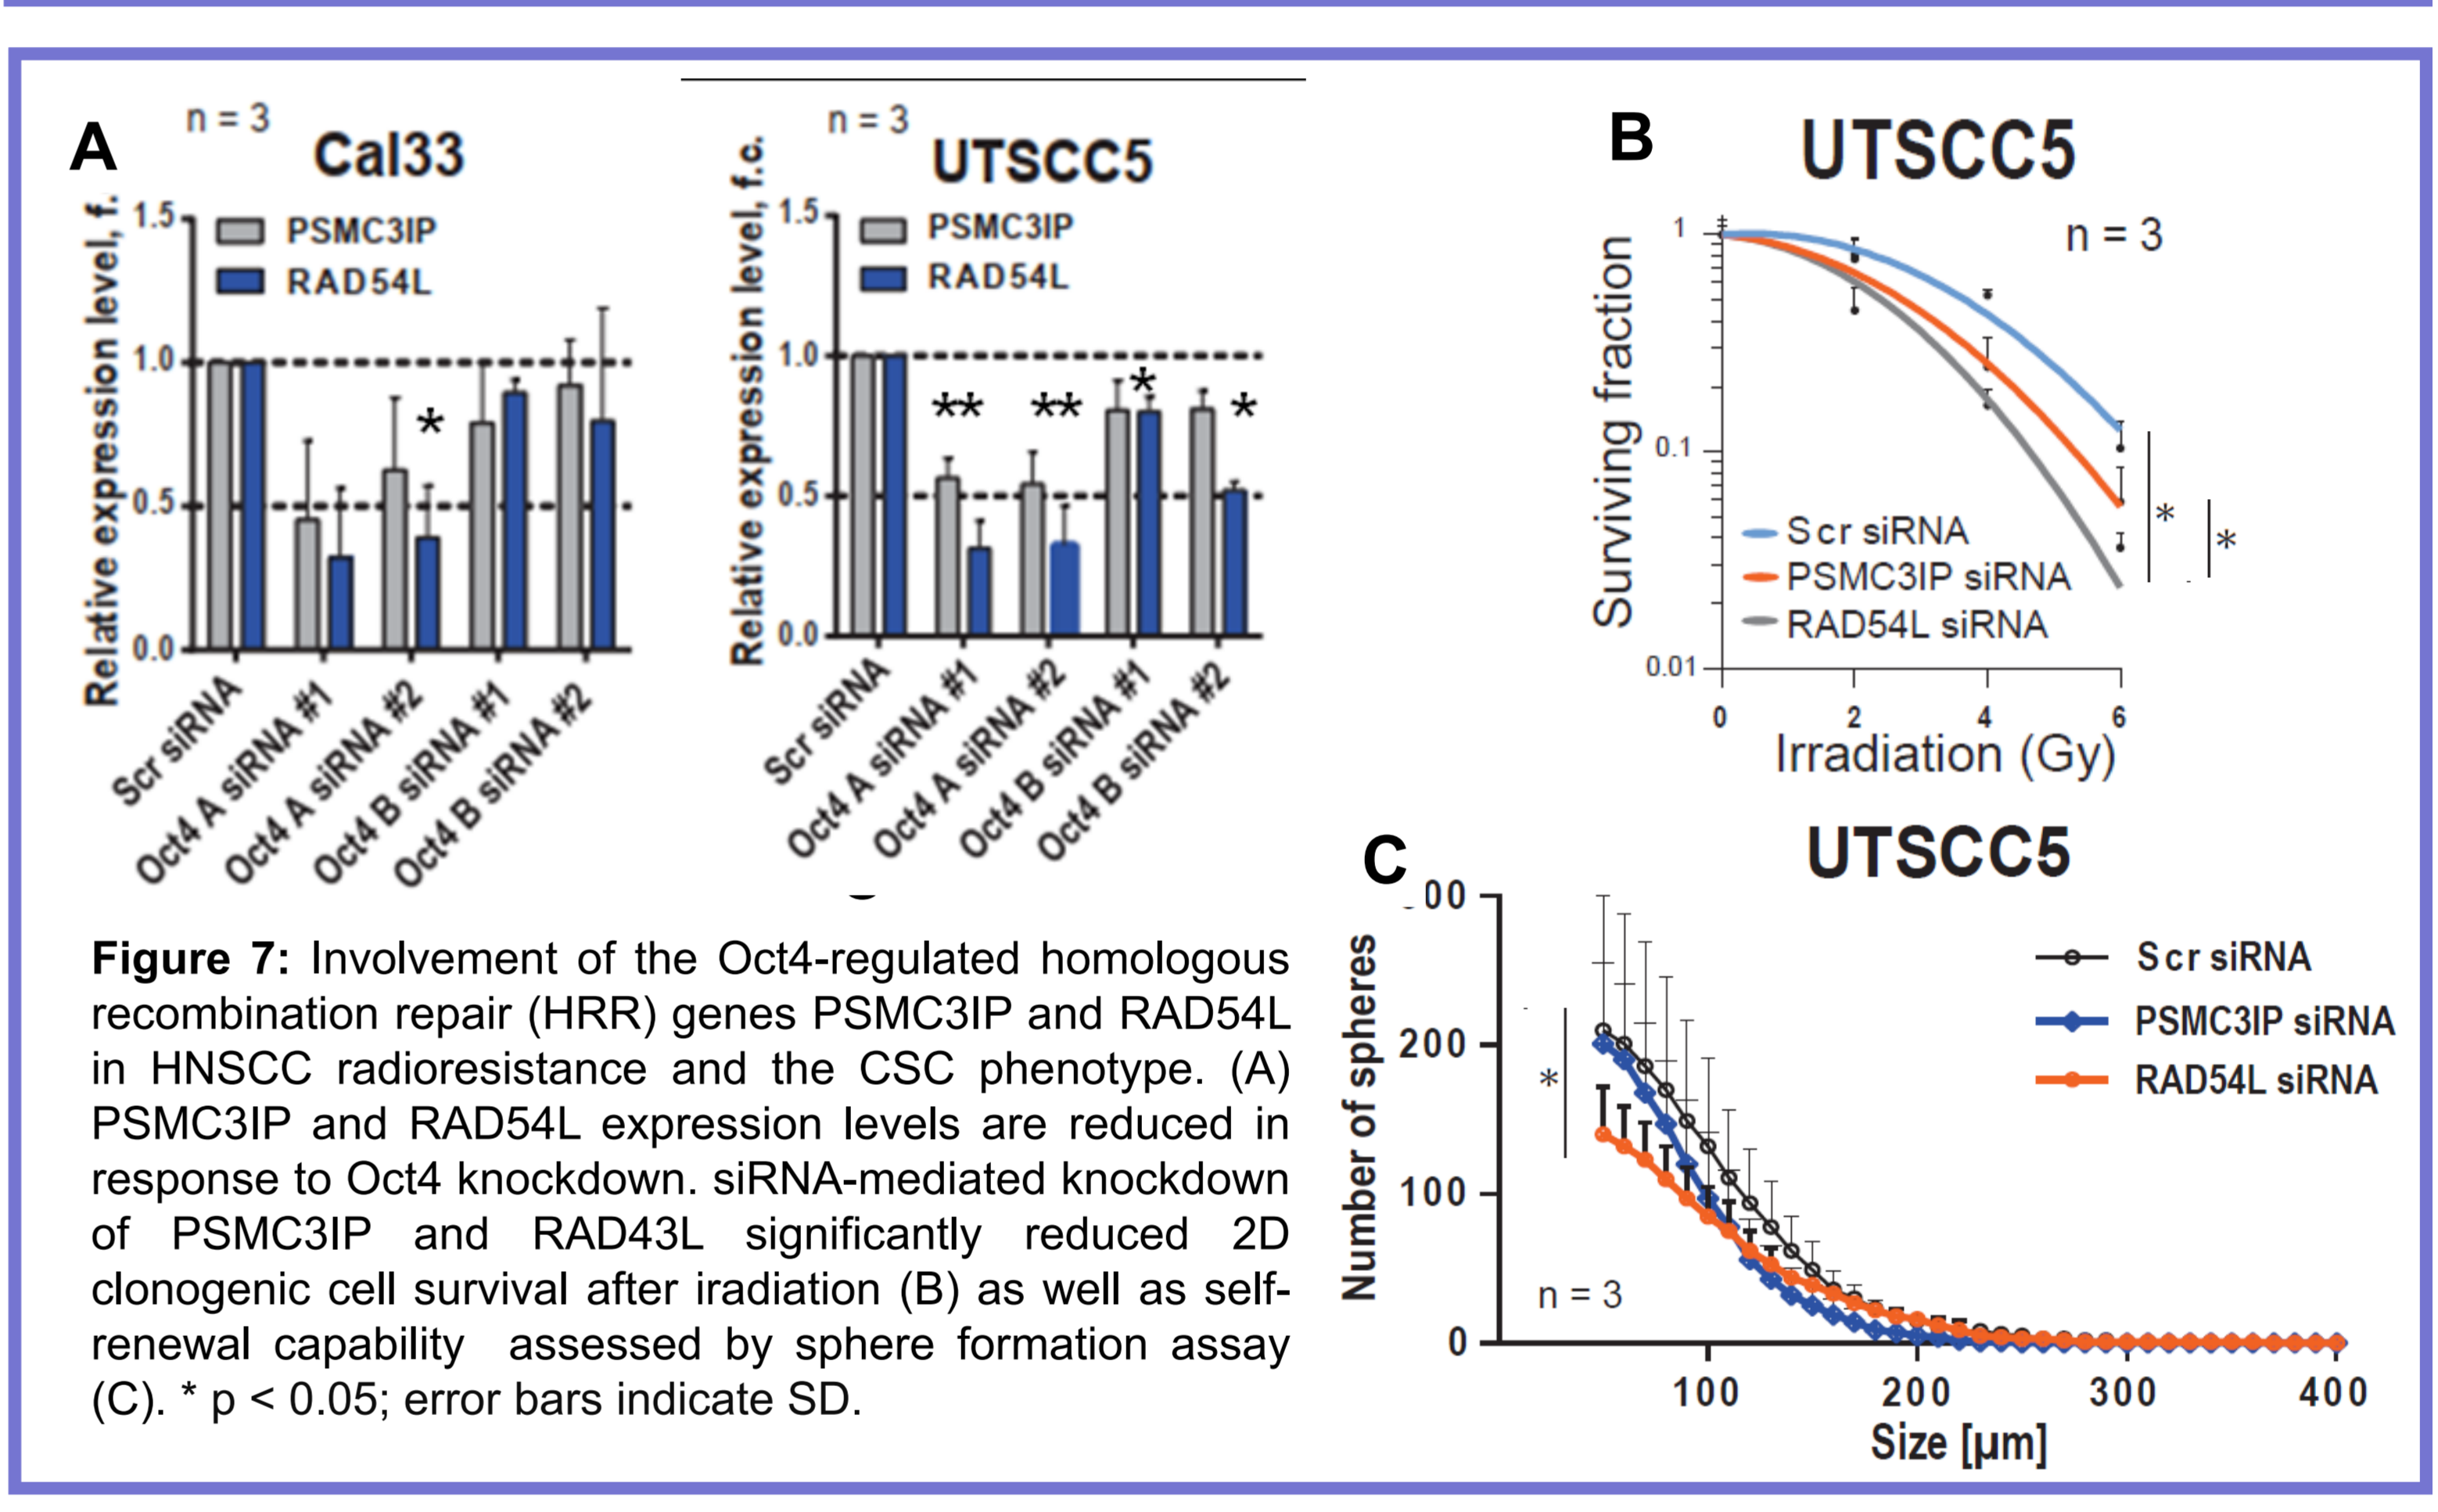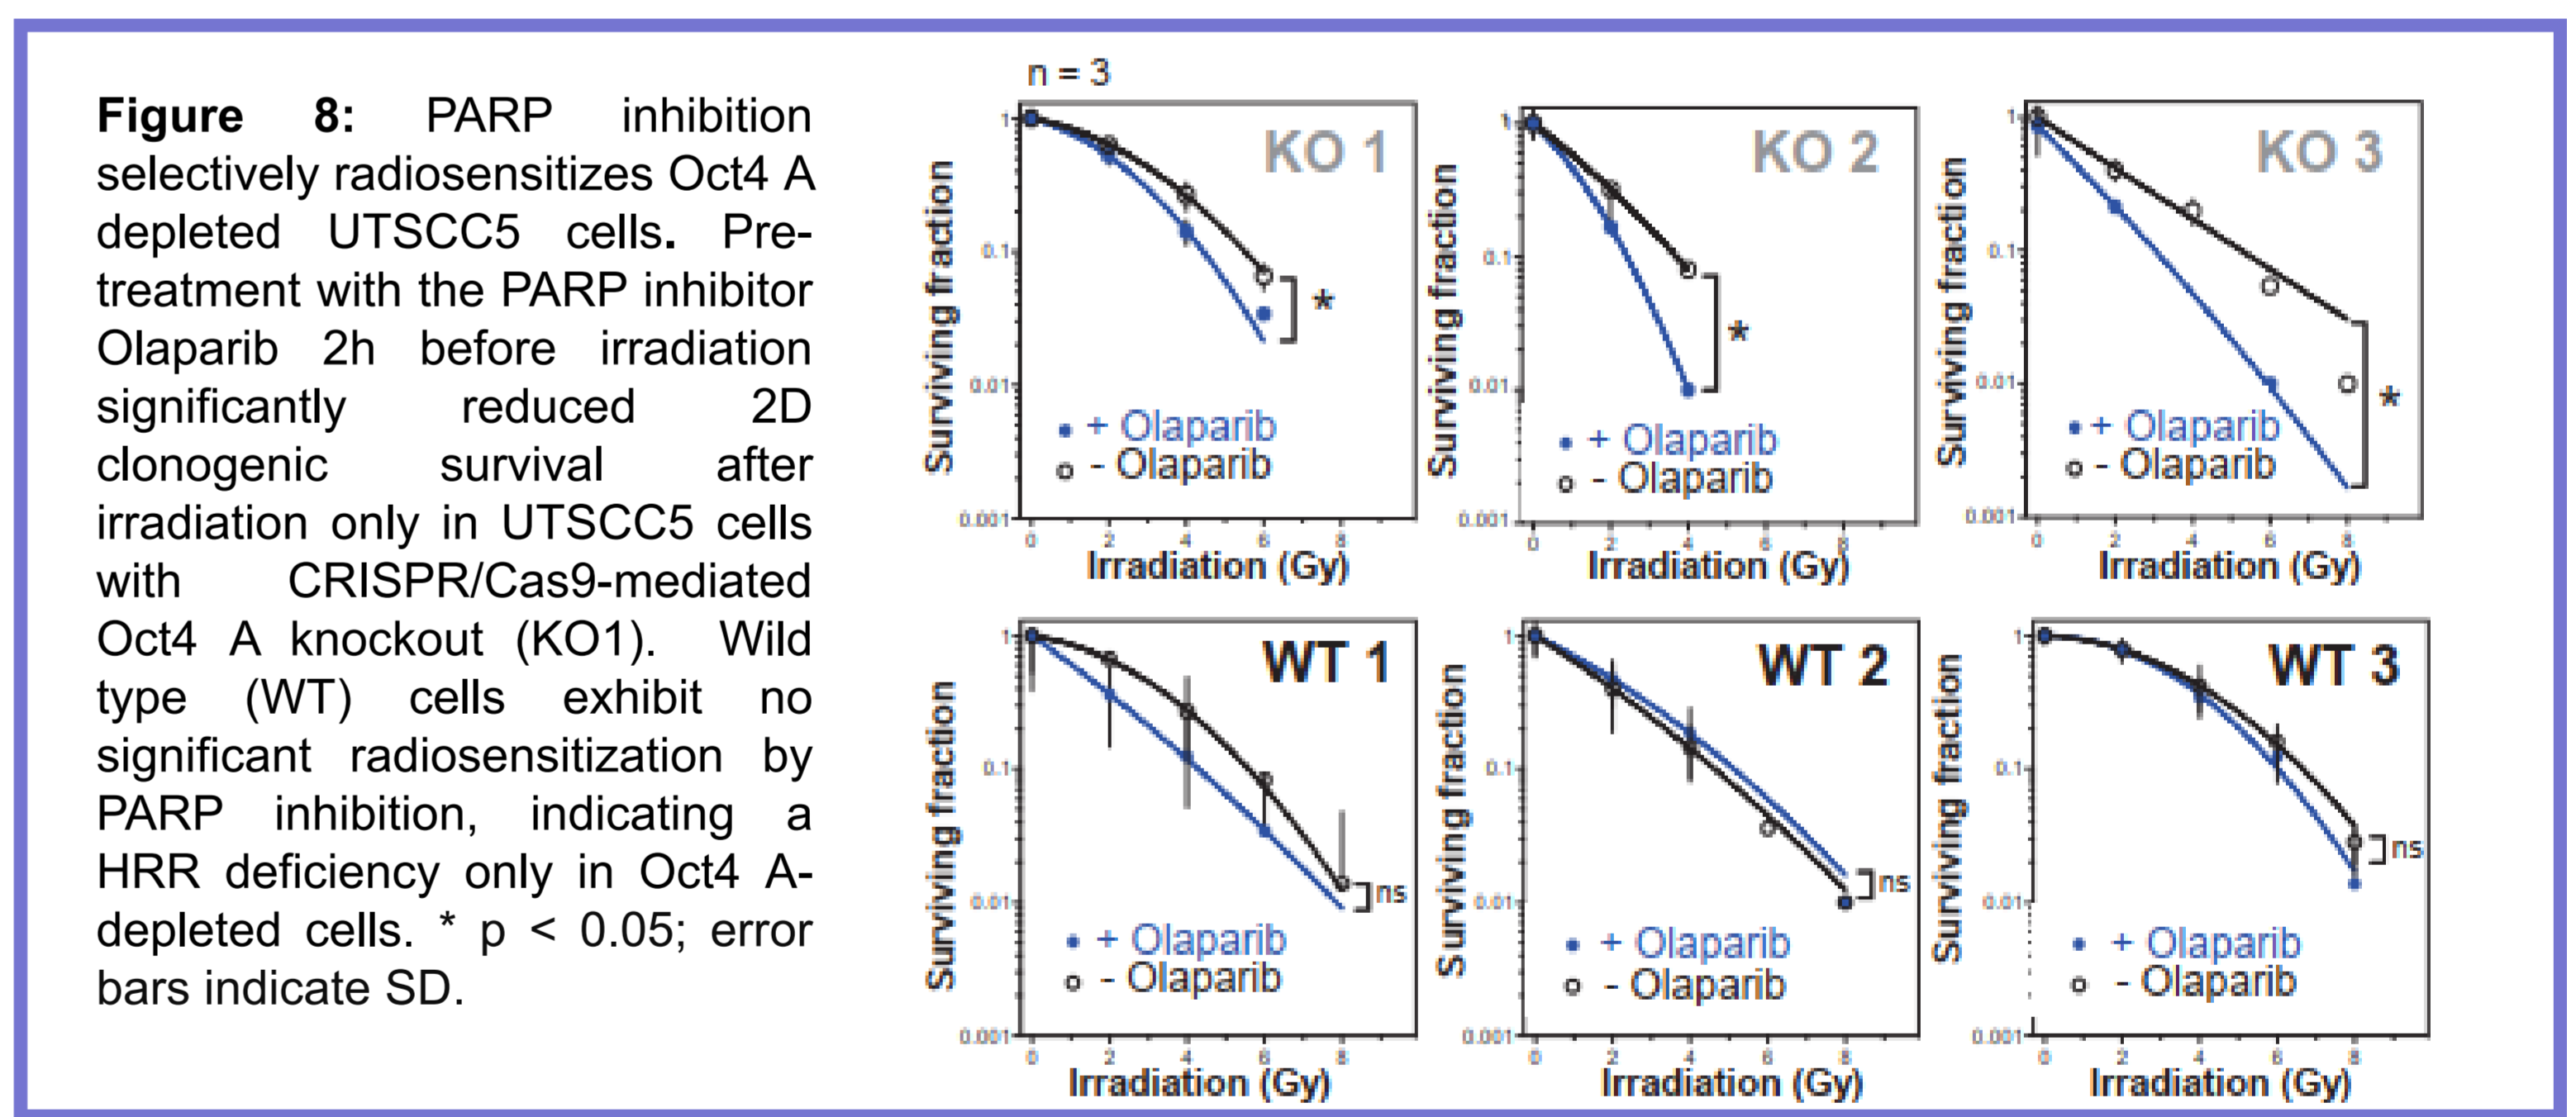

**Conclusion:** Our results in HPV-negative HNSCC cell models emphasize the interplay between DNA repair factors and the HNSCC CSC phenotype. The involvement of Oct4 in the regulation of DNA repair and cell cycle progression provides new insights into HNSCC radioresistance and opens possibilities for combination therapy with PARP inhibitors.

**References**

1. Leemans et al., Nat. Rev. Cancer 2011;
2. Pulte and Brenner, Oncologist 2010;
3. Linge et al., Clin. Cancer Res. 2016;
4. Baskar et al., Front Mol Biosci. 2014;
5. Krause et al., Adv Drug Deliv Rev. 2017;
6. Wang and Dai, Stem Cells 2010;
7. Lin et al., Oncogene;
8. Hein et al., Int J Oncol. 2014;
9. Zhang and Hunter, Int J Cancer 2014
